# Supplementary material
Source: PubMed Central journal article supplement (PMC545855)

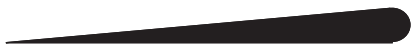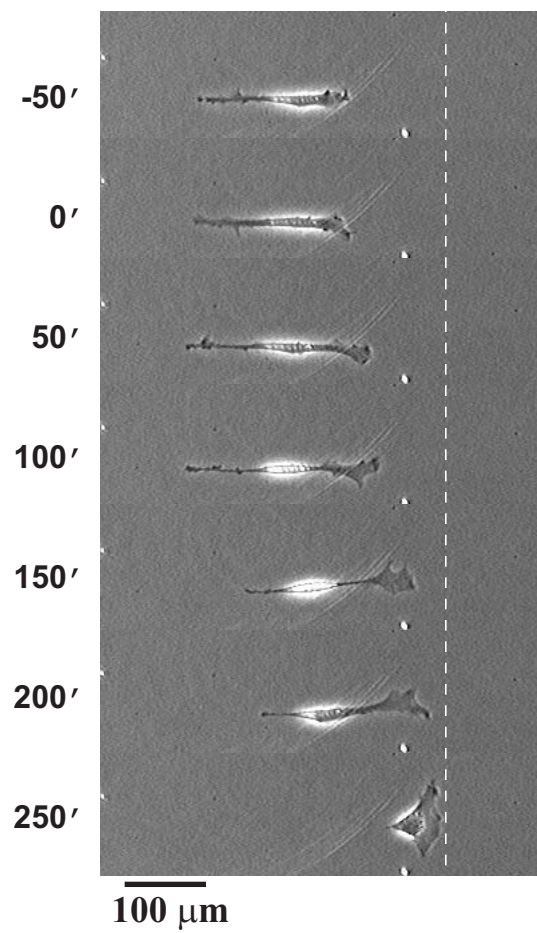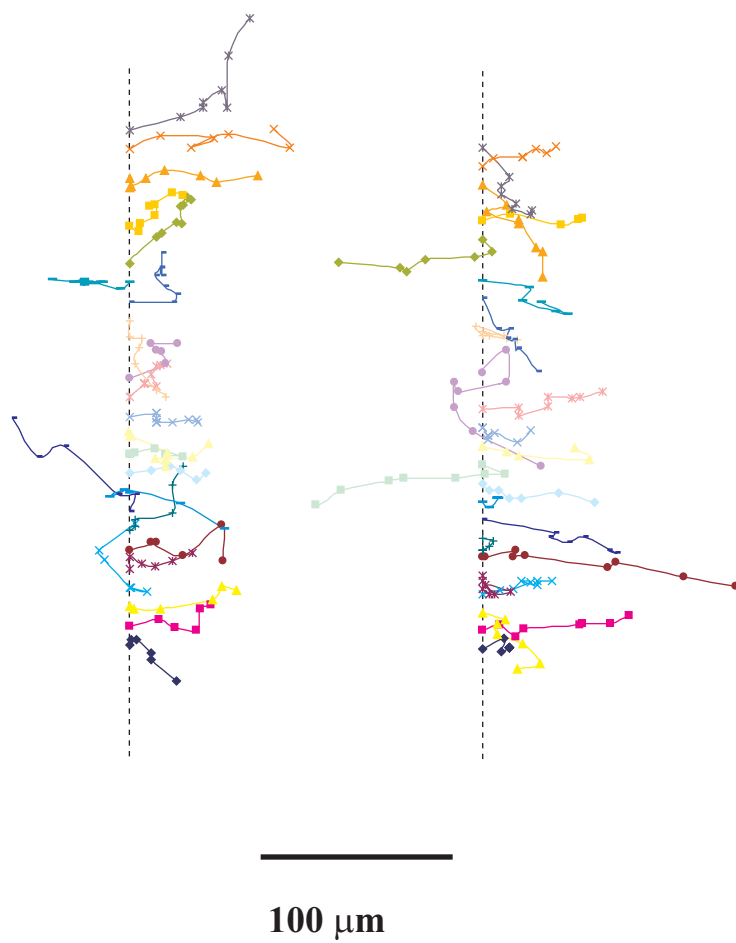

Supplement: pnas_102_4_975__1.pdf [file pnas_102_4_975__1.pdf]

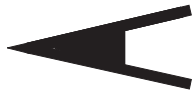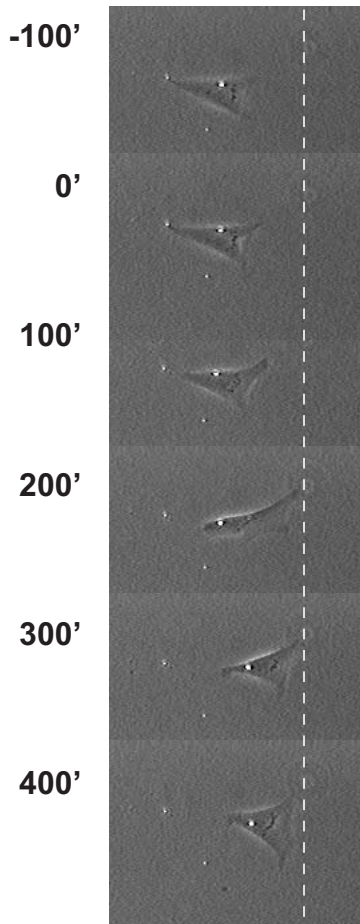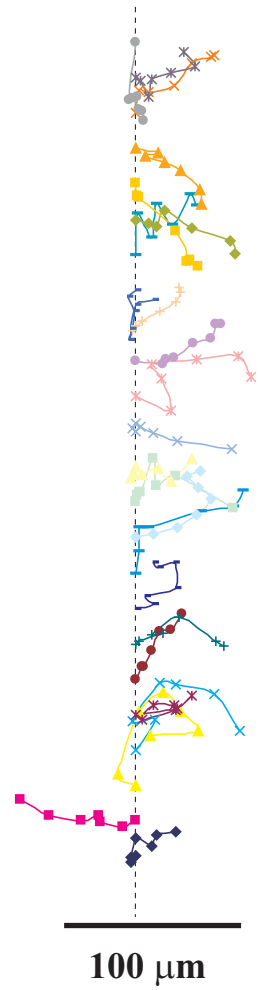

Supplement: pnas_102_4_975__10.pdf [file pnas_102_4_975__10.pdf]

noco

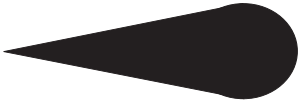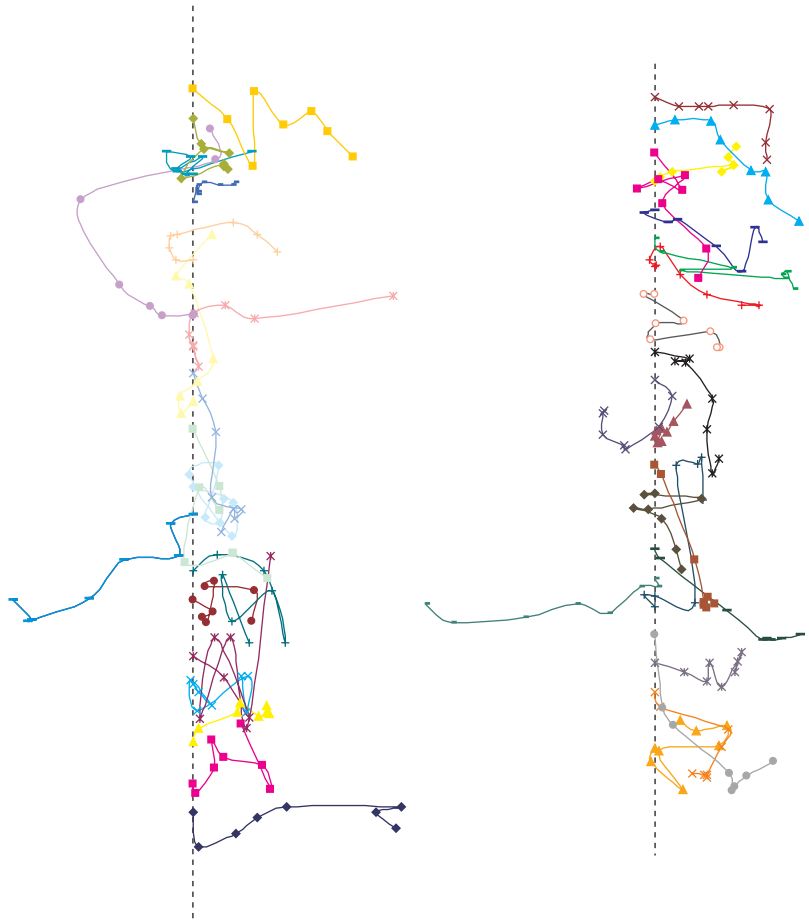

100  $\mu\text{m}$

Supplement: pnas_102_4_975__11.pdf [file pnas_102_4_975__11.pdf]

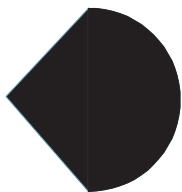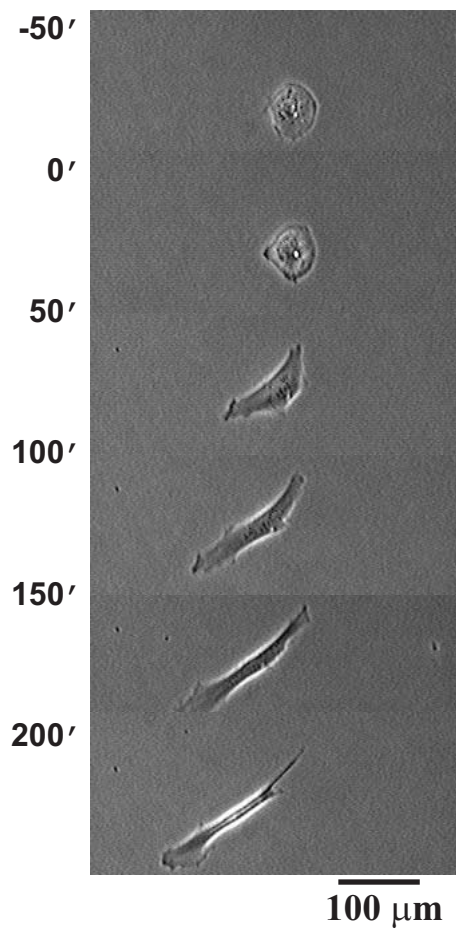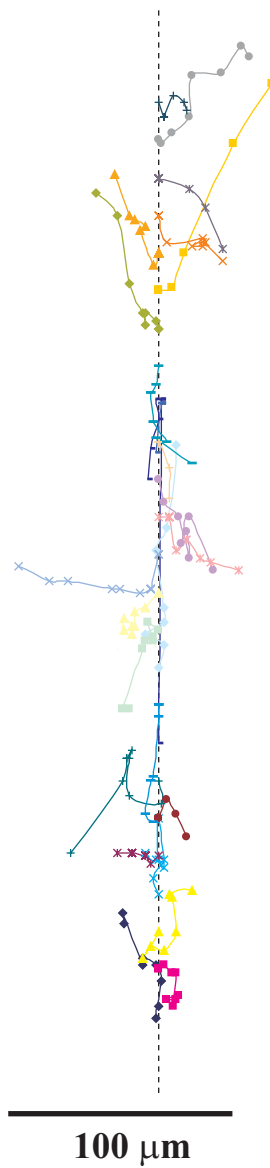

Supplement: pnas_102_4_975__2.pdf [file pnas_102_4_975__2.pdf]

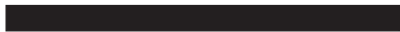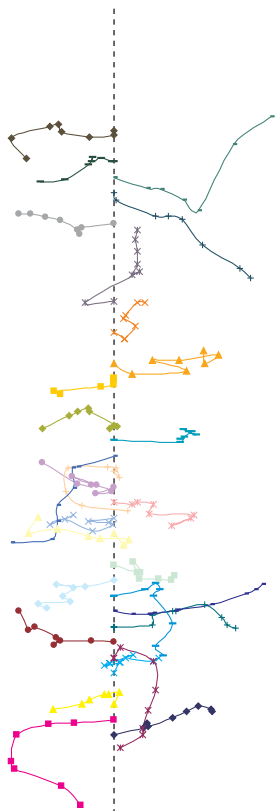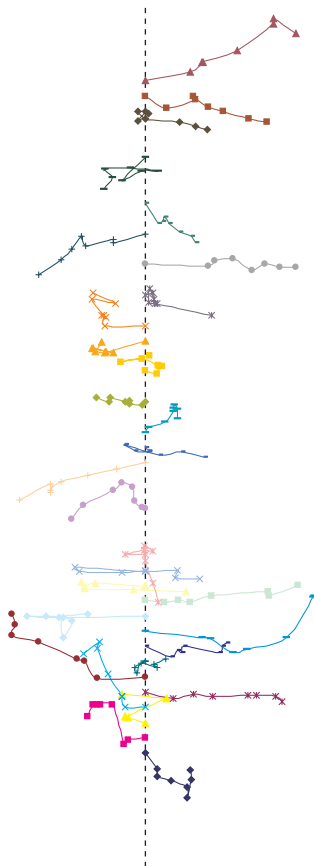

100  $\mu\text{m}$

Supplement: pnas_102_4_975__3.pdf [file pnas_102_4_975__3.pdf]

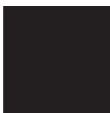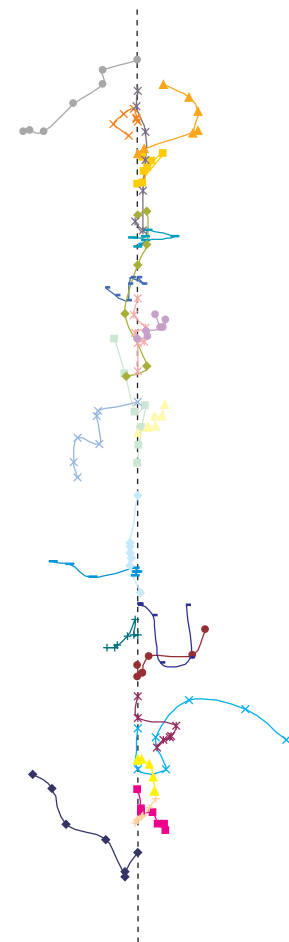

100  $\mu\text{m}$

Supplement: pnas_102_4_975__4.pdf [file pnas_102_4_975__4.pdf]

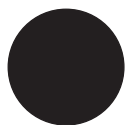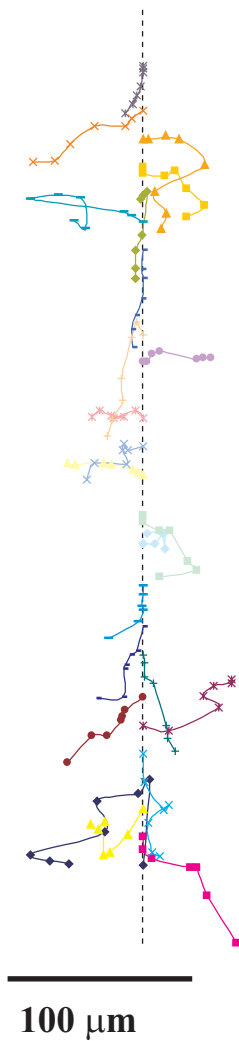

Supplement: pnas_102_4_975__5.pdf [file pnas_102_4_975__5.pdf]

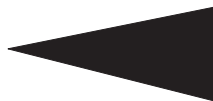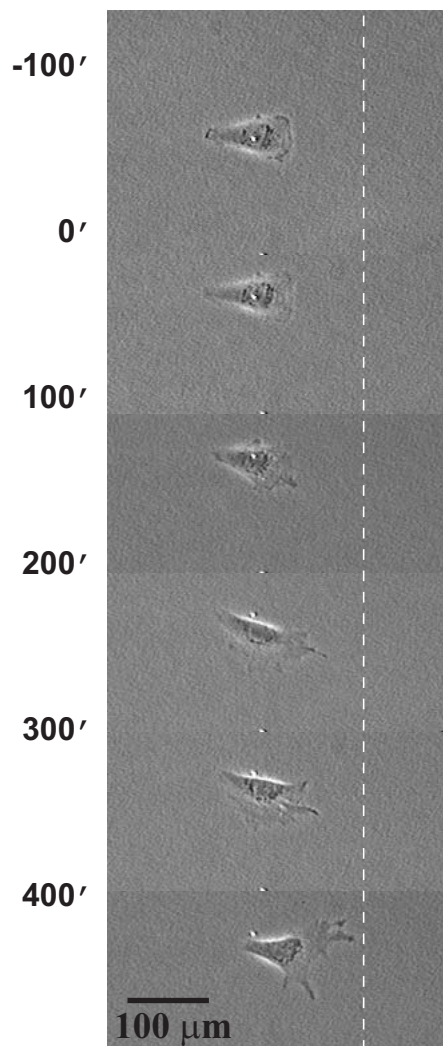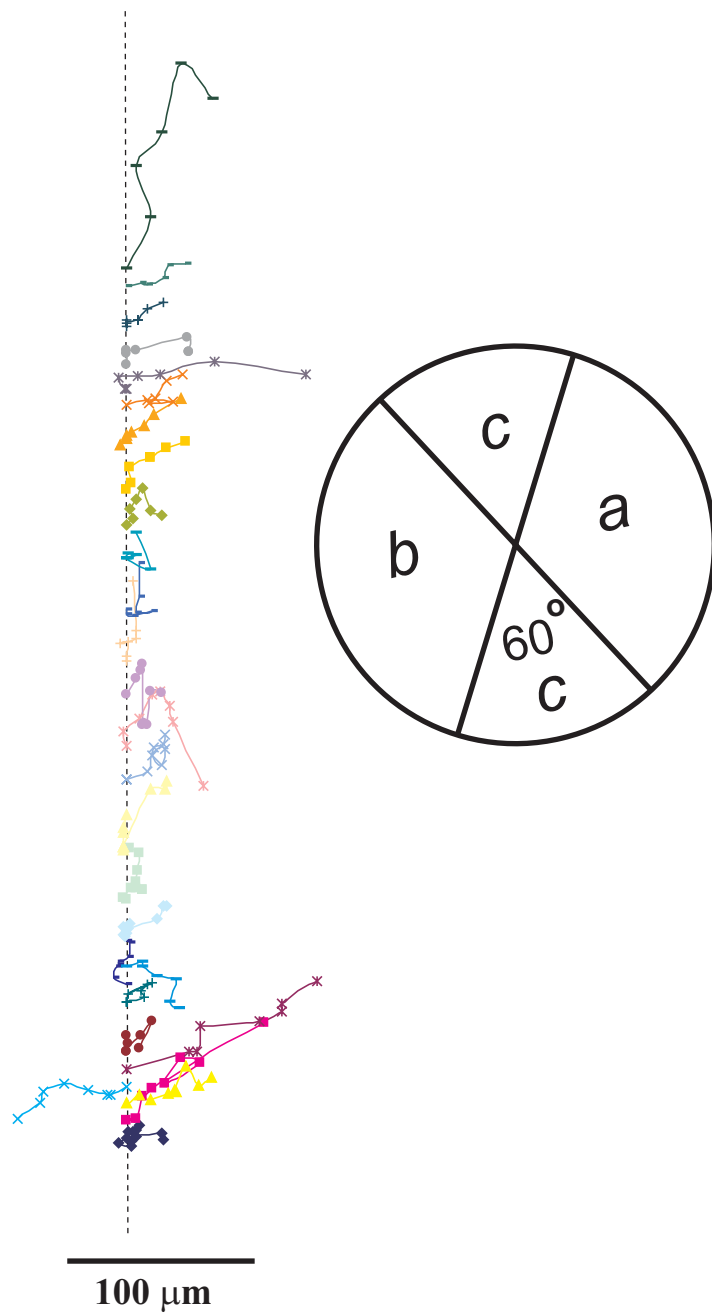

Supplement: pnas_102_4_975__6.pdf [file pnas_102_4_975__6.pdf]

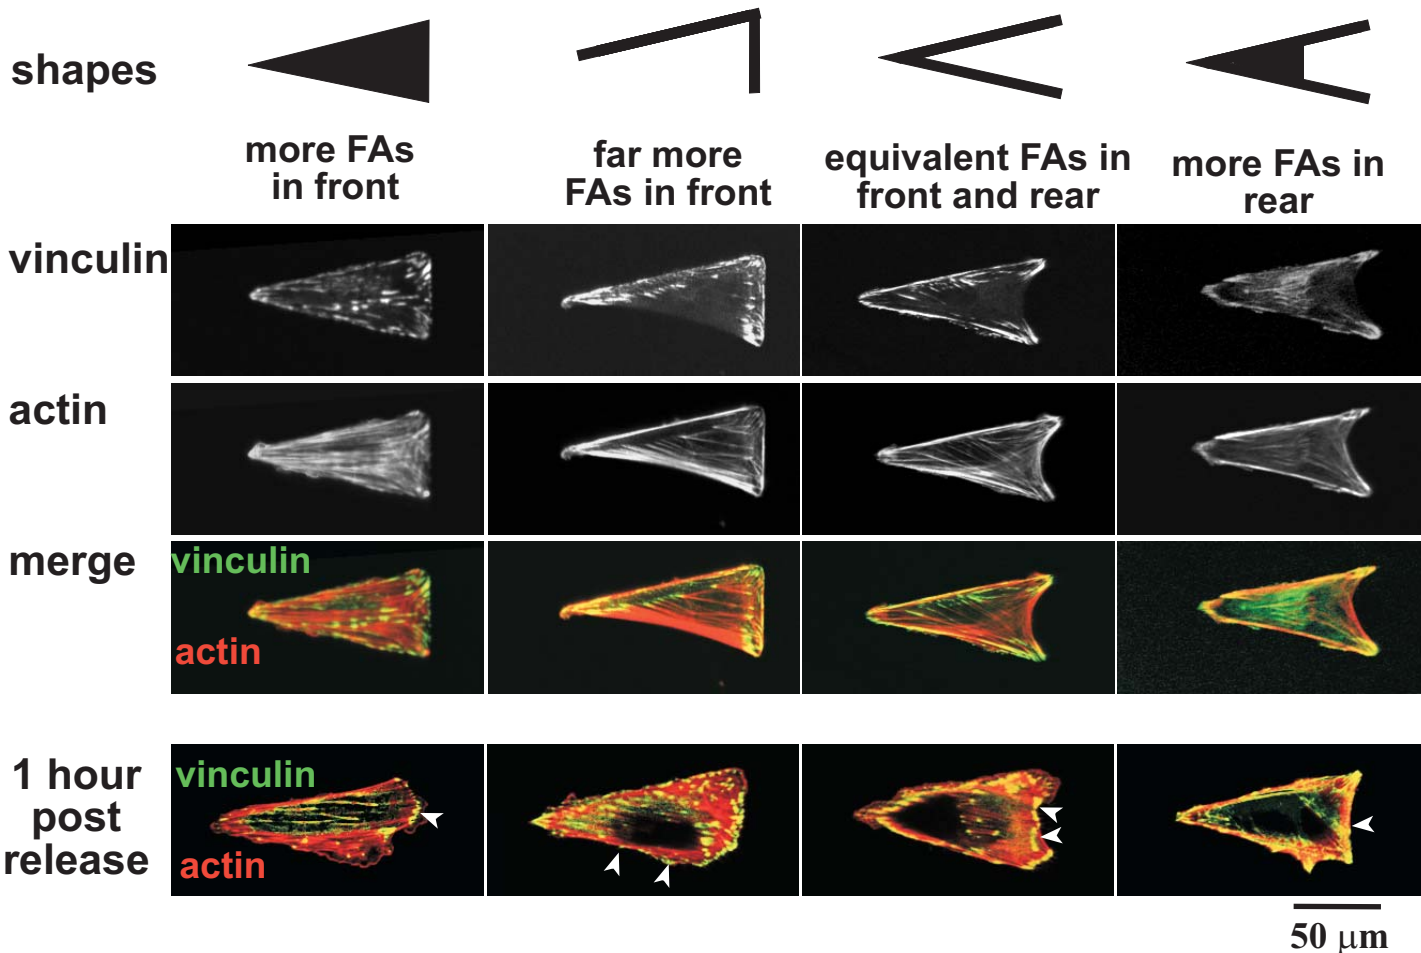

Supplement: pnas_102_4_975__7.pdf [file pnas_102_4_975__7.pdf]

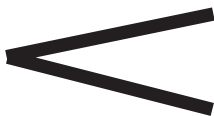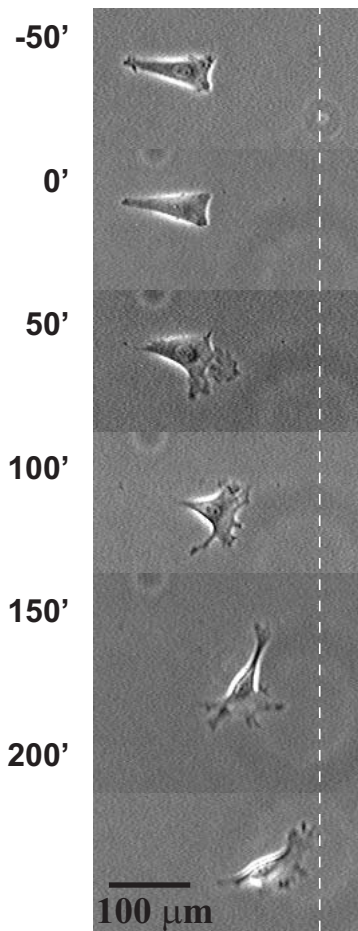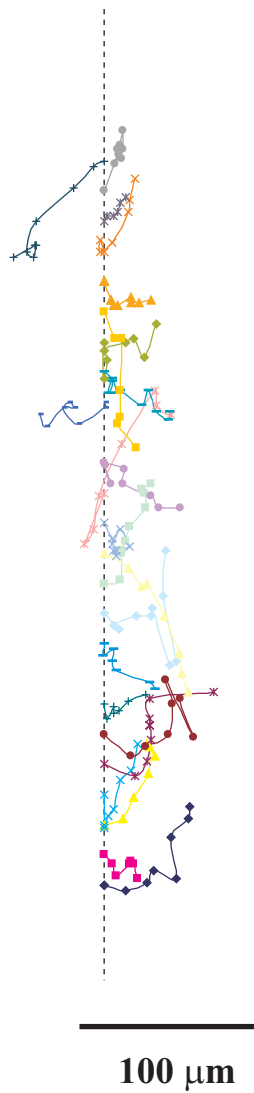

Supplement: pnas_102_4_975__8.pdf [file pnas_102_4_975__8.pdf]

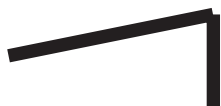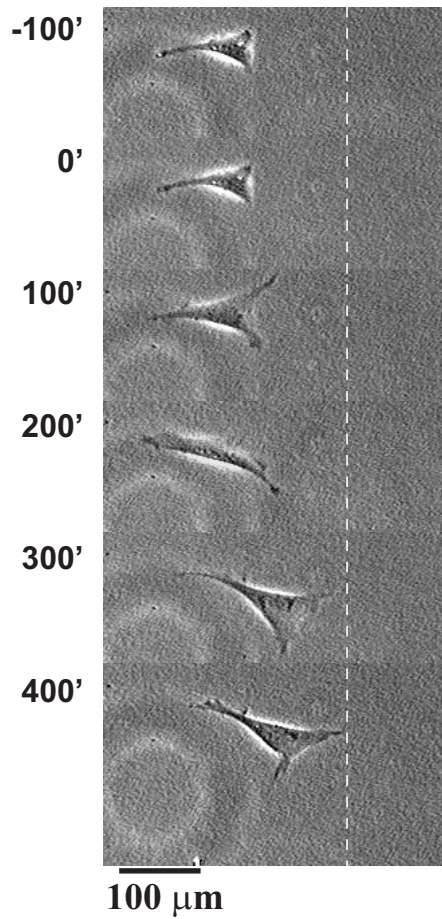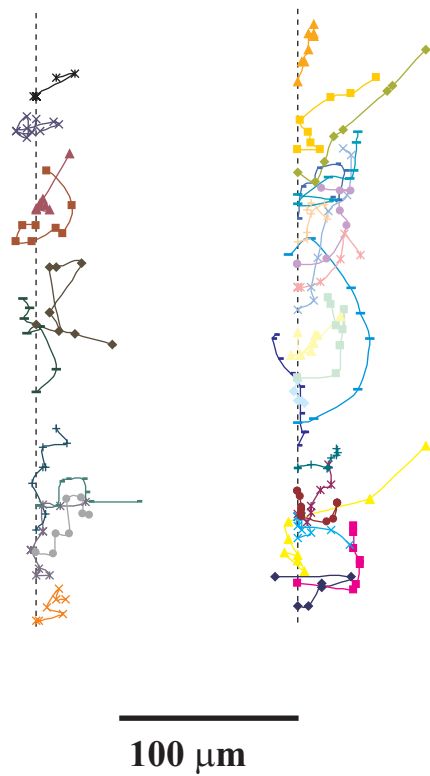

Supplement: pnas_102_4_975__9.pdf [file pnas_102_4_975__9.pdf]
